# Supplementary material for: Improving the photovoltaic performance by employing alkyl chains perpendicular to the π-conjugated plane of an organic dye in dye-sensitized solar cells
Source: Royal Society of Chemistry journal article supplement (doi:10.1039/c9tc01520e), 2019-01-01
Supplement: c9tc01520e1.pdf [file c9tc01520e1.pdf]

## Electronic Supplementary Information (ESI)

# Improving photovoltaic performance by installing alkyl chains perpendicular to $\pi$ -conjugated plane of organic dye for dye-sensitized solar cells

Hongjin Chen<sup>1</sup>, Guangyu Lyu<sup>1</sup>, Youfeng Yue<sup>2</sup>, Tingwei Wang<sup>1</sup>, Dong-Ping Li<sup>3\*</sup>, Heng Shi<sup>1</sup>, Jieni Xing<sup>1</sup>, Junyan Shao<sup>1</sup>, Rui Zhang<sup>1\*</sup>, and Jian Liu<sup>1\*</sup>

1. College of Chemical Engineering, Nanjing Forestry University, Jiangsu Key Lab of Biomass-based Green Fuels and Chemicals, Nanjing 210037, P. R. China

2. Electronics and Photonics Research Institute, National Institute of Advanced Industrial Science and Technology (AIST), 1-1-1 Higashi 305-8565, Tsukuba, Japan

3. Department of Chemistry, Nanchang University, Nanchang 330031, PR China

E-mail: [liu.jian@njfu.edu.cn](mailto:liu.jian@njfu.edu.cn), [zhangrui@njfu.edu.cn](mailto:zhangrui@njfu.edu.cn), [nculdp@126.com](mailto:nculdp@126.com)

## General

All chemicals and reagents were used as received from chemical companies without further purification. Column chromatography was performed using with silicagel as a stationary phase. Cyclic voltammetry (CV) was performed on a CH Instruments 624D potentiostat/galvanostat system. All CV measurements were carried out in anhydrous CH<sub>2</sub>Cl<sub>2</sub> containing 0.1 M TBAHFP as a supporting electrolyte, purging with argon prior to conduct the experiment. Platinum electrode was used as a working electrode, Ag/AgNO<sub>3</sub> in saturated KNO<sub>3</sub>(aq.) as a reference electrode, and a platinum wire as a counter electrode. UV-Vis spectra were measured in CH<sub>2</sub>Cl<sub>2</sub> solution or TiO<sub>2</sub> film using UV-3600 Spectrophotometer (SHIMADZU). Mass spectra were measured on a Shimadzu Biotech matrix-assisted laser desorption ionization (MALDI) mass spectrometer. The <sup>1</sup>H- and <sup>13</sup>C-NMR measurements were performed by a DRX-400 or DRX-600 spectrometer (Bruker BioSpin). Geometry optimization and Molecular orbital distributions of three dyes were performed using B3LYP functional and 6-31G (d,p) basis set implemented in the Gaussian 09 program package.<sup>1</sup>

## Cell Fabrication and characterization

The device fabrication was performed as follows. A double-layered TiO<sub>2</sub> film as photoanode containing 11 μm main transparent layer with ca. 20 nm sized titania particles and a 5 μm scattering layer with ca. 400 nm sized titania particles were screen printed on the fluorine-doped tin oxide (FTO) conducting glass substrate. The double-layered film were heated to 520 °C and sintered for 1 hour and then cooled to 80 °C, following additional treatment with 0.1 M HCl aqueous solution. The resulted TiO<sub>2</sub> films were washed, dried and then dipped into a 3 × 10<sup>-4</sup> M acetonitrile/n-BuOH (1/1, v/v) solution of the corresponding sensitizer, or a mixture of sensitizer (0.3 mM) and DCA (20 mM) in CH<sub>3</sub>CN/n-BuOH (1/1, v/v) for 40 h. Afterwards, the dye-loaded TiO<sub>2</sub> film and a platinum coated conducting glass were assembled into a DSSC of a sandwich type and sealed by heating the Surlyn spacer (40 mm thick). An electrolyte consisting of 0.6 M dimethylpropylimidazolium iodide, 0.05 M I<sub>2</sub>, 0.1 M LiI and 0.5 M TBP in acetonitrile was injected into the spacer from the counterelectrode side through a pre-drilled hole, and then the hole was sealed with a Bynel sheet and a thin-glass-slide cover by heating.

The *I-V* characteristics were carried out by using a black metal mask with an aperture area of 0.2304 cm<sup>-2</sup> under standard AM 1.5 sunlight, 100 mW·cm<sup>-2</sup> (WXS-155S-10: Wacom Denso Co. Japan). Monochromatic IPCE spectra were determined with monochromatic incident light of 1 × 10<sup>16</sup> photons per cm<sup>2</sup> under 100 mW·cm<sup>-2</sup> in director current mode (CEP-2000BX, Bunko-Keiki). The IMVS were characterized with a potentiostat (Solartron1287) equipped with a frequency response analyzer (Solartron1255B) at an open-circuit condition based on a monochromatic illumination (420 nm) controlled by a Labview system to obtain the photovoltaic response induced by the modulated light.

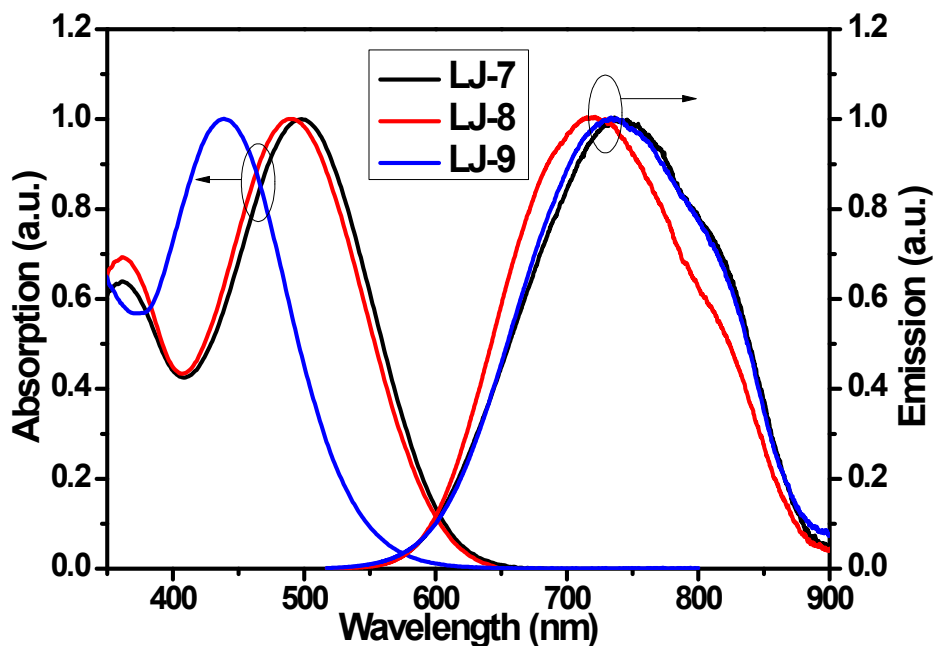

Fig. S1 Normalized UV-vis and emission spectra of dyes LJ-7, LJ-8 and LJ-9 in  $\text{CH}_2\text{Cl}_2$ .

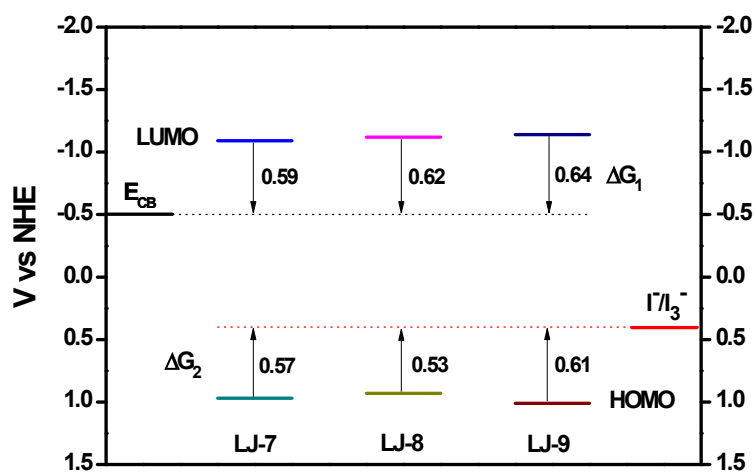

Fig. S2 Energy-level diagram of dyes LJ-7, LJ-8, and LJ-9, the electrolyte and  $\text{TiO}_2$ ,  $E_{\text{CB}}$ : energy level of conduction band of  $\text{TiO}_2$ ;  $\Delta G_1$ : driving force for electron injection;  $\Delta G_2$ : driving force for regeneration of the oxidized dyes.

## DFT Calculation

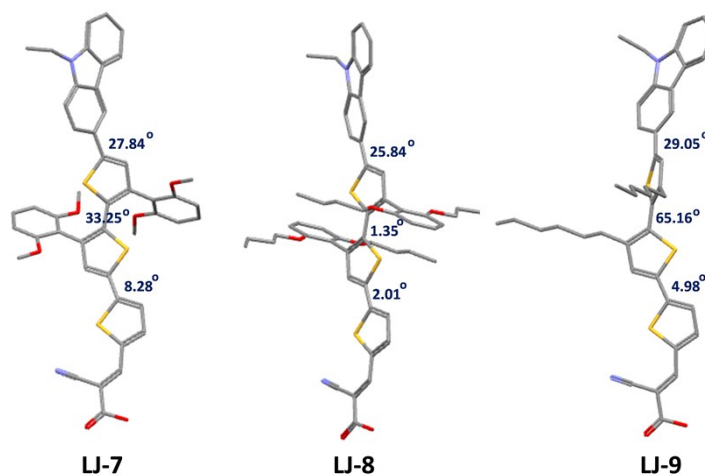

**Fig. S3** Optimized ground-state geometries and dihedral angles between the  $\pi$ -planes of LJ-7, LJ-8 and LJ-9.

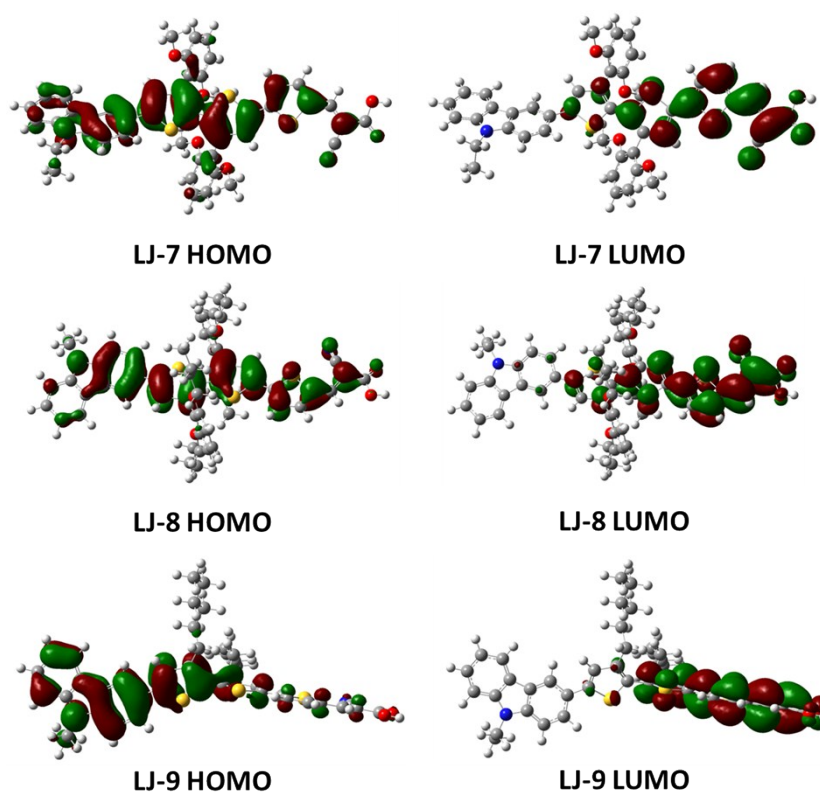

**Fig. S4** The HOMO and LUMO of dyes LJ-7, LJ-8 and LJ-9 optimized at B3LYP/6-31G\*\* level.

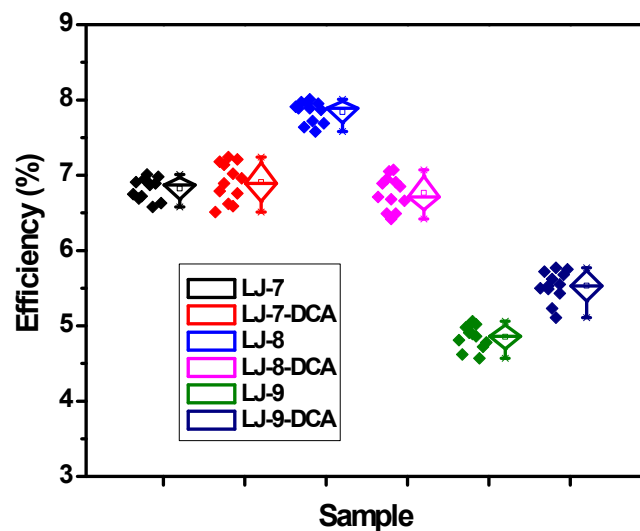

**Fig. S5** The power conversion efficiency statistics of DSSCs based on dyes LJ-7, LJ-8 and LJ-9 with/without DCA coadsorption. (12 devices for each sample).

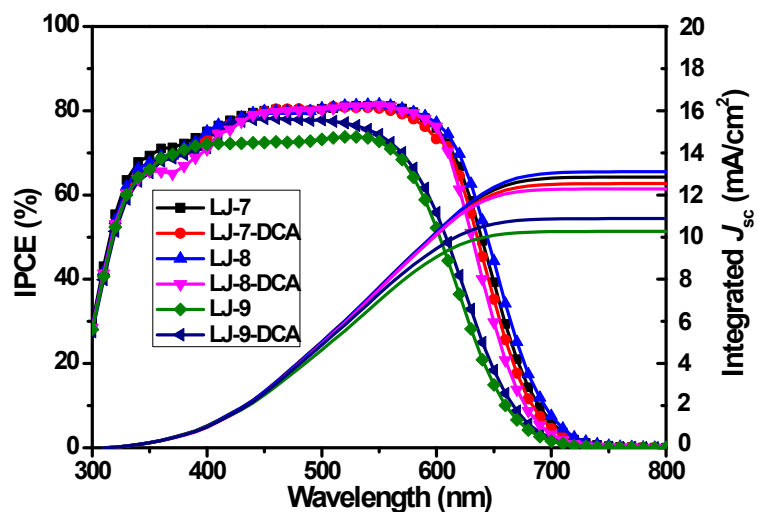

**Fig. S6** IPCE spectra and the integrated  $J_{sc}$  of DSSCs based on dyes LJ-7, LJ-8 and LJ-9 with/without DCA coadsorption.

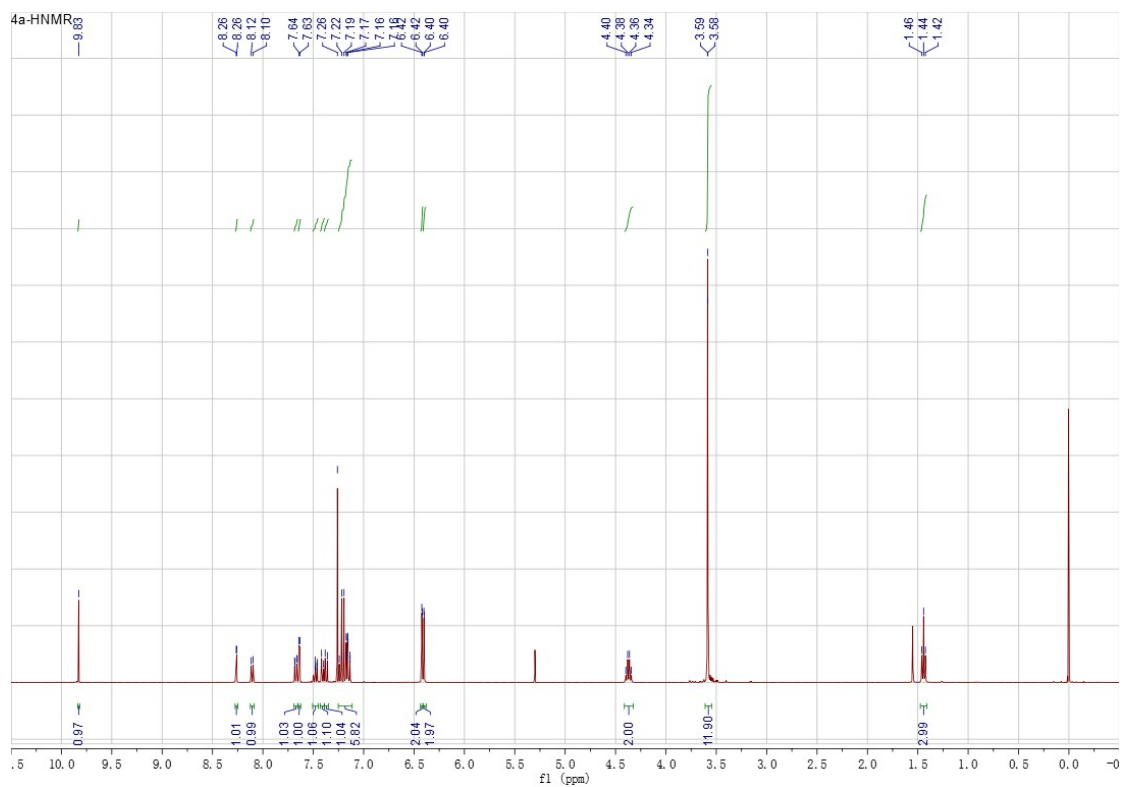

Fig. S7 <sup>1</sup>H NMR spectra of compound 4a.

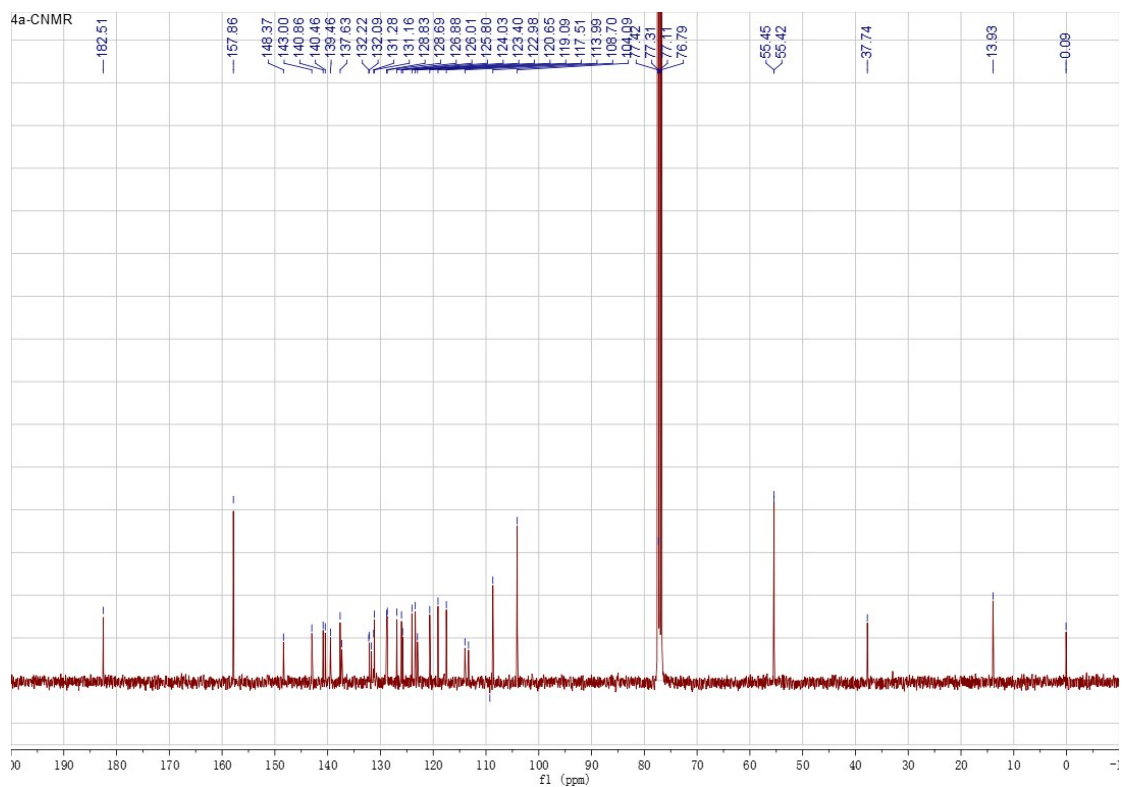

Fig. S8 <sup>13</sup>C NMR spectra of compound 4a.

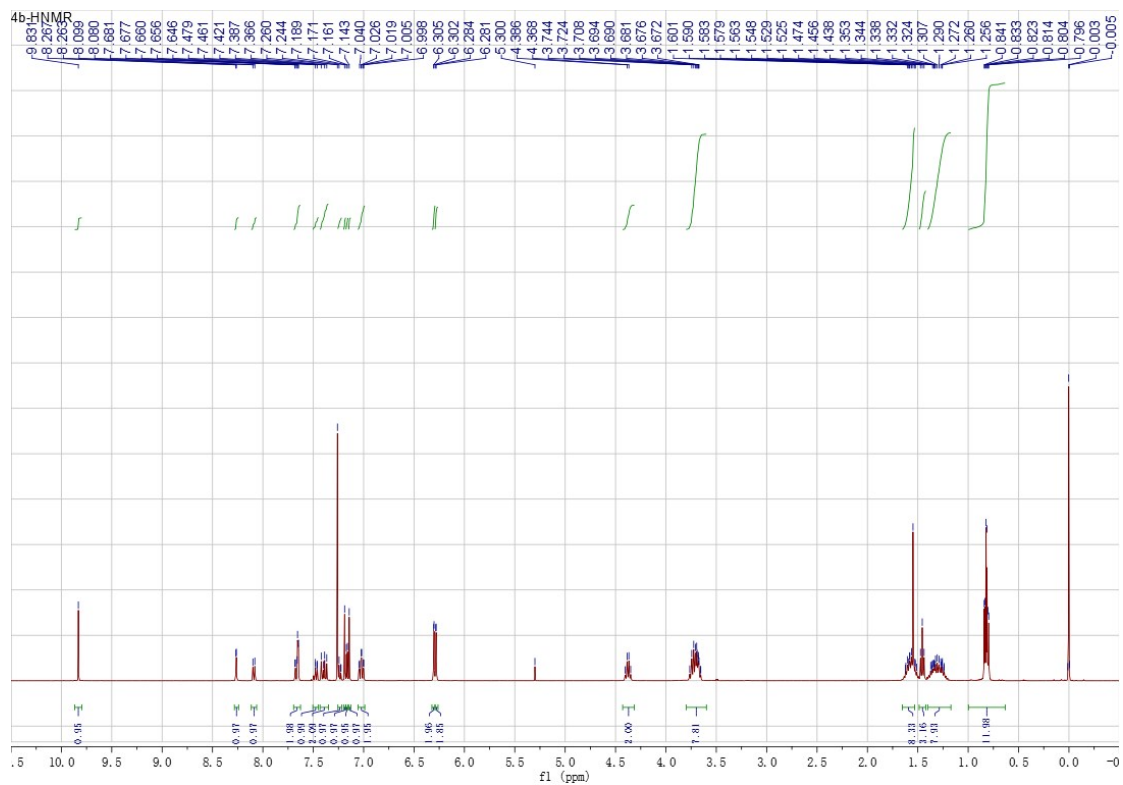

Fig. S9 <sup>1</sup>H NMR spectra of compound 4b.

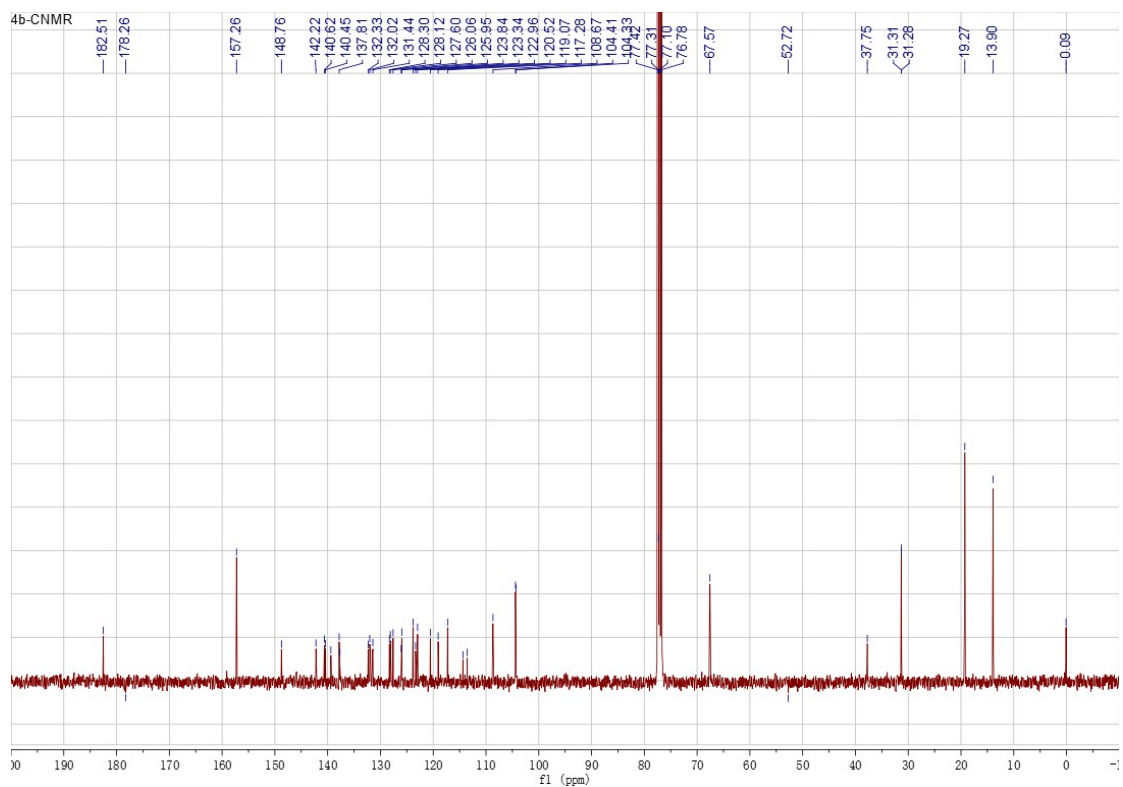

Fig. S10 <sup>13</sup>C NMR spectra of compound 4b.

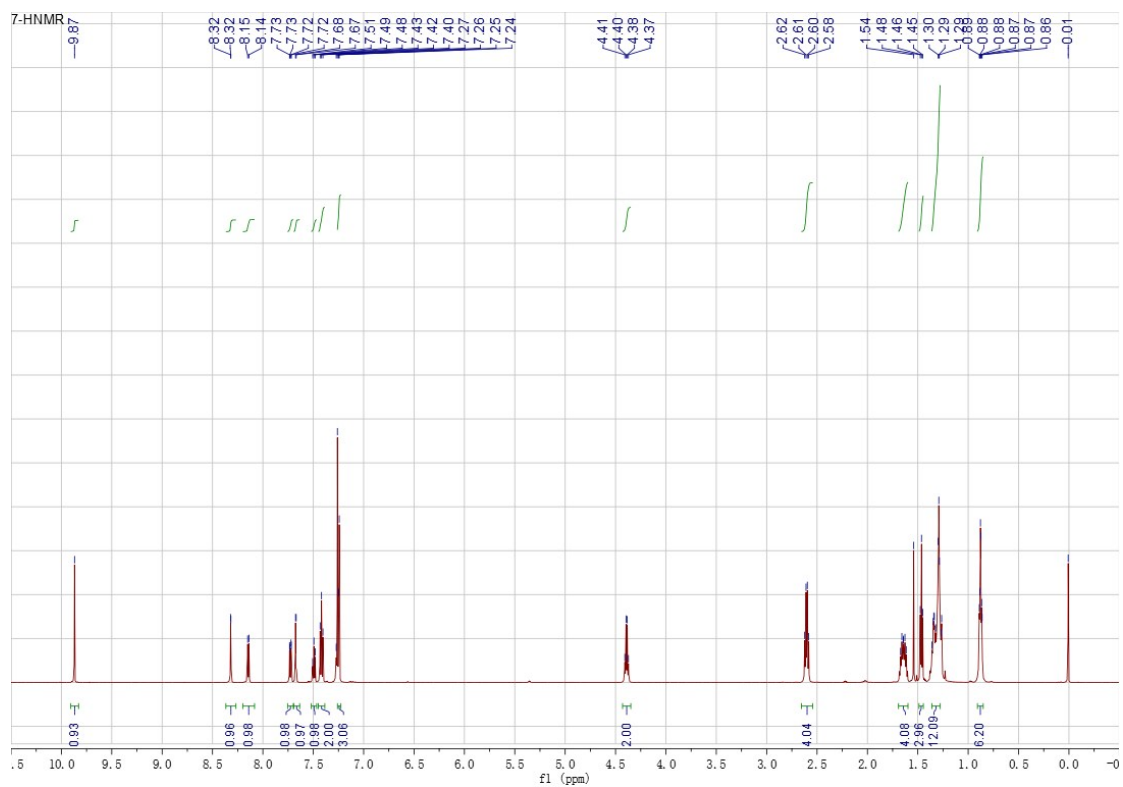

Fig. S11 <sup>1</sup>H NMR spectra of compound 7.

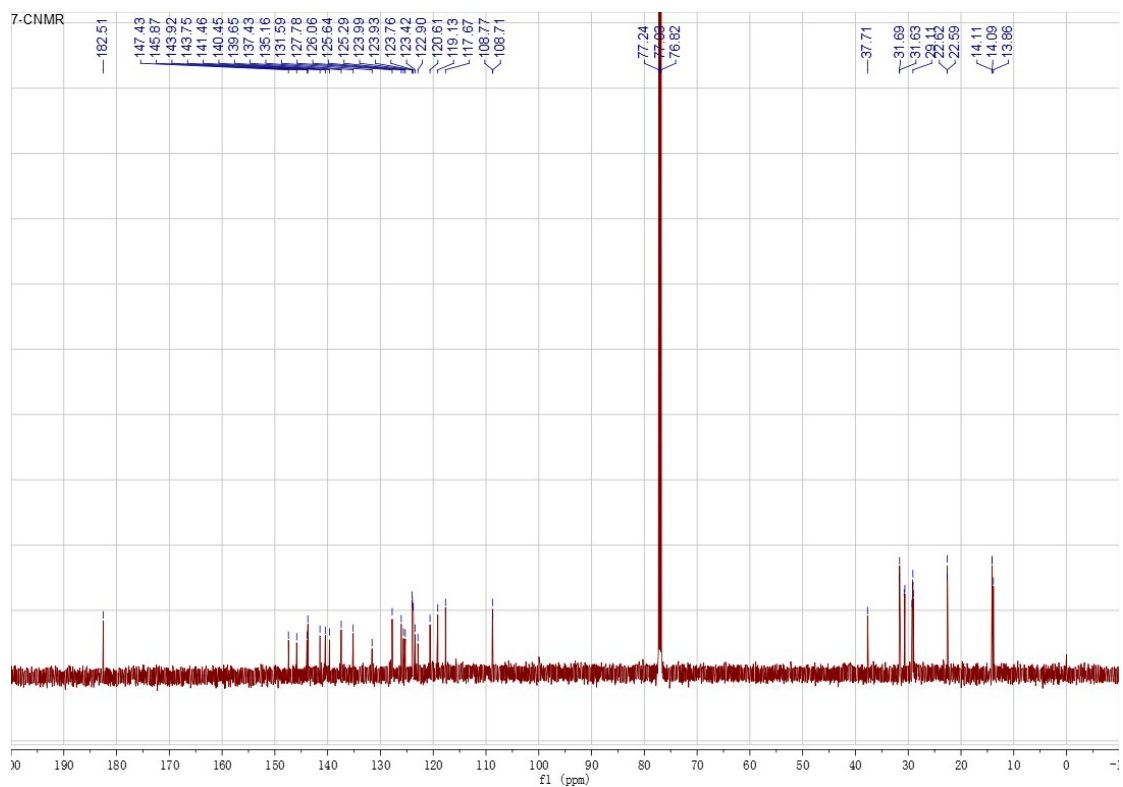

Fig. S12 <sup>13</sup>C NMR spectra of compound 7.



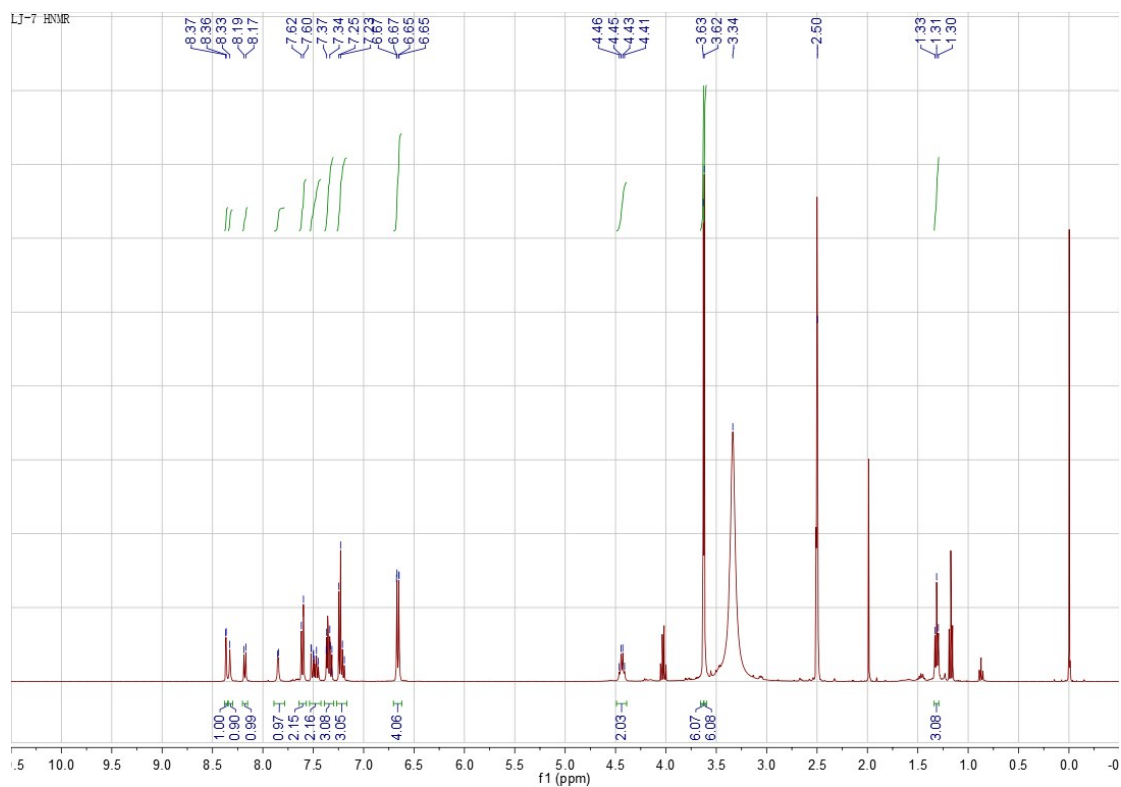

**Fig. S13**  $^1\text{H}$  NMR spectra of dye LJ-7.

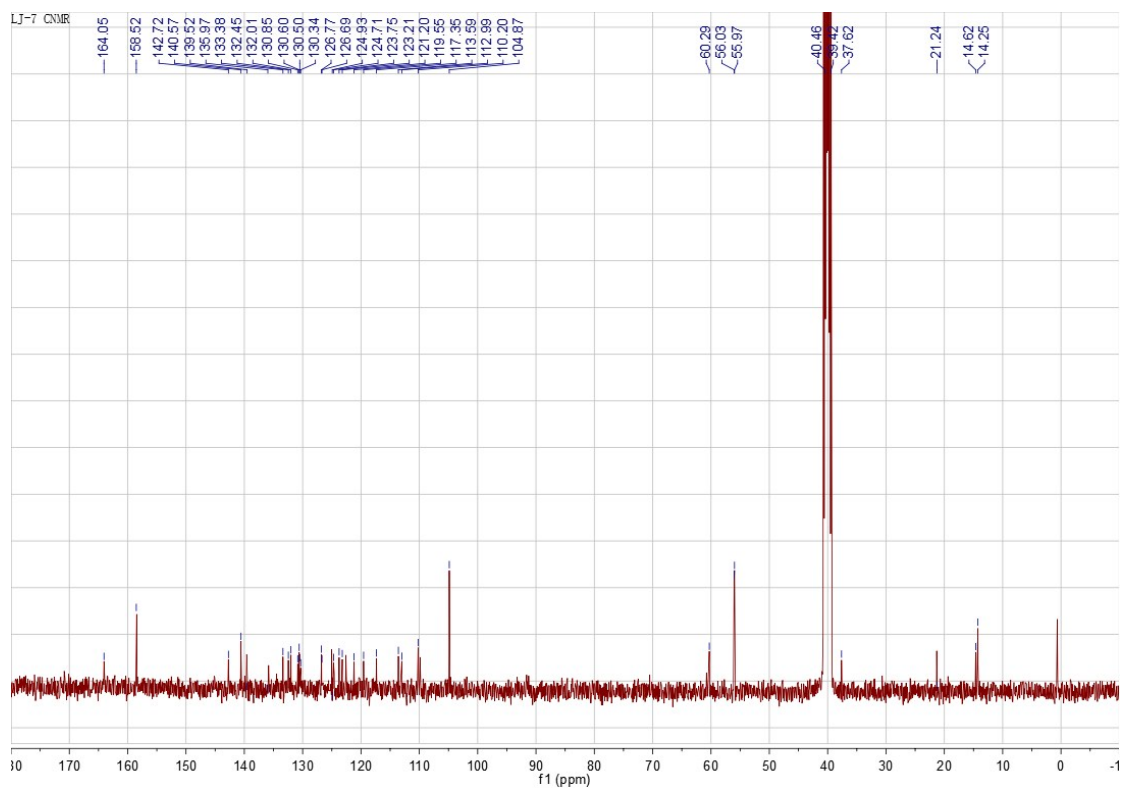

**Fig. S14**  $^{13}\text{C}$  NMR spectra of dye LJ-7.

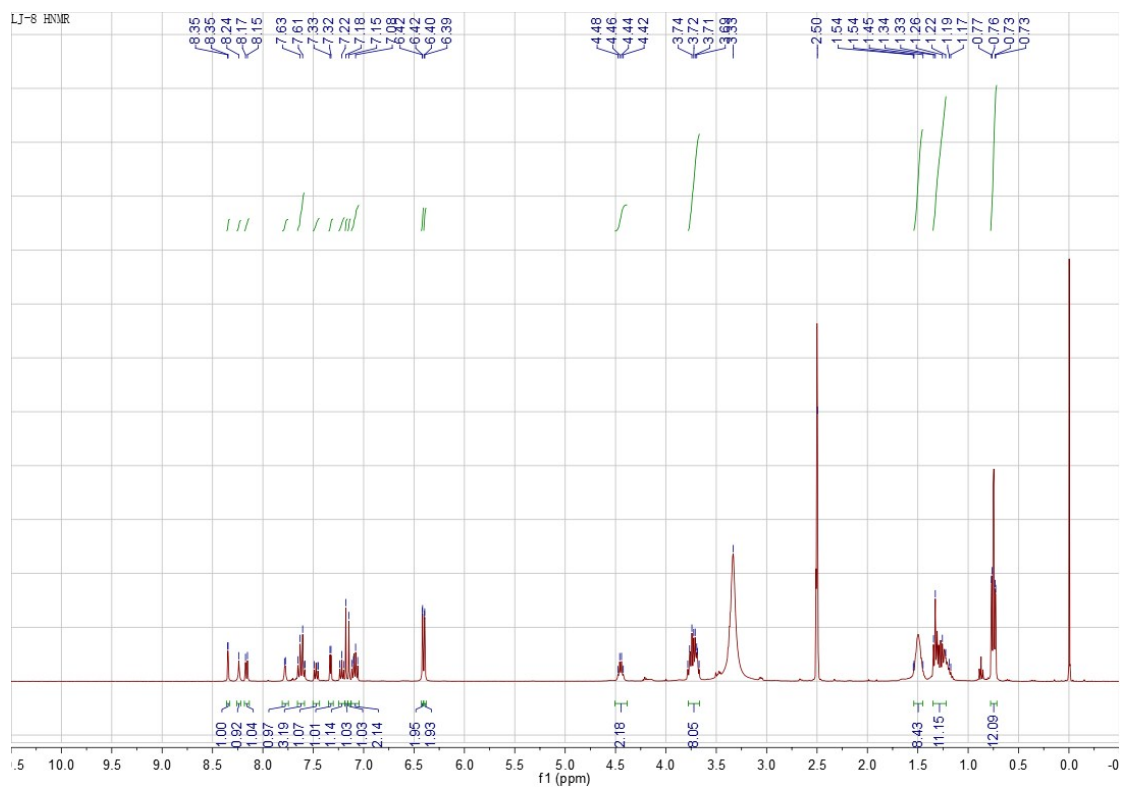

**Fig. S15** <sup>1</sup>H NMR spectra of dye LJ-8.

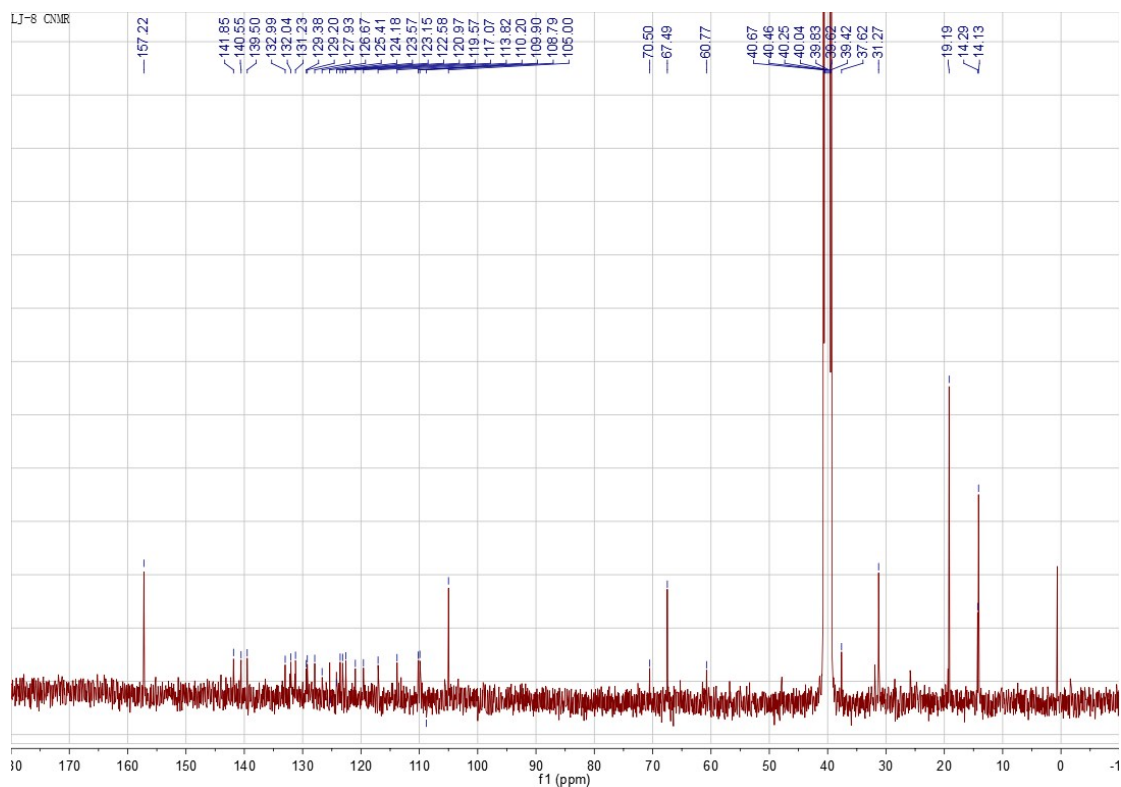

**Fig. S16** <sup>13</sup>C NMR spectra of dye LJ-8.

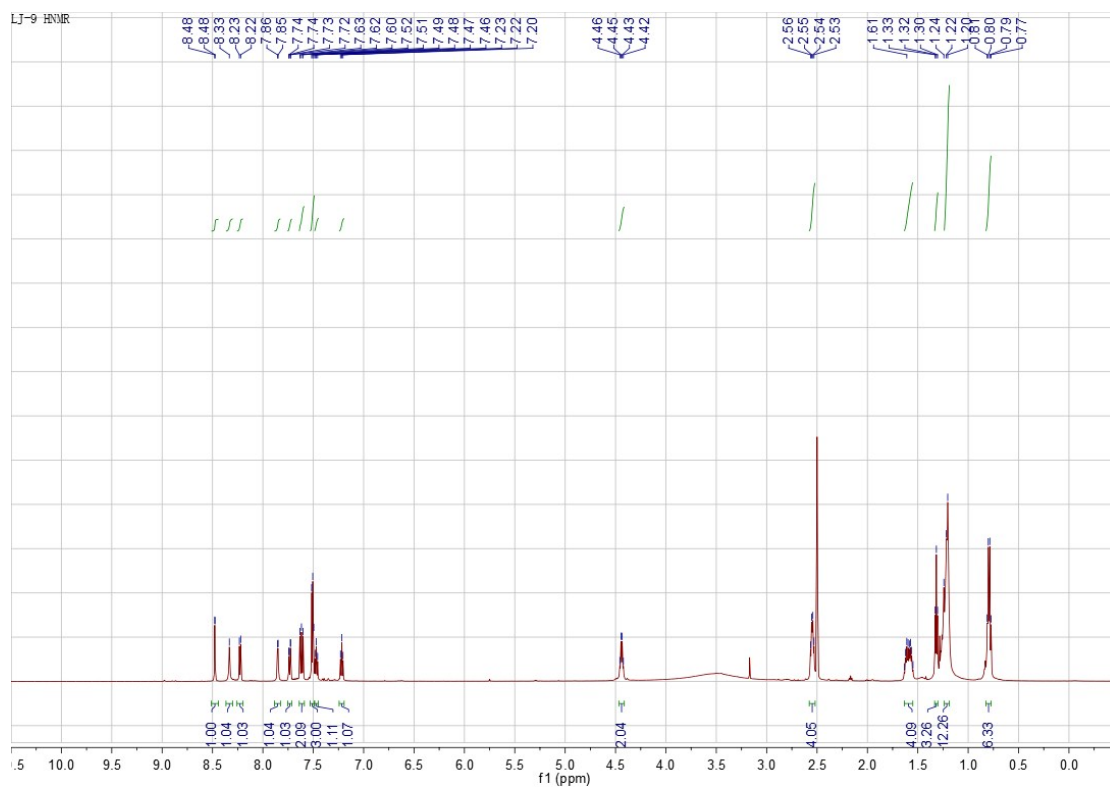

**Fig. S17** <sup>1</sup>H NMR spectra of dye LJ-9.

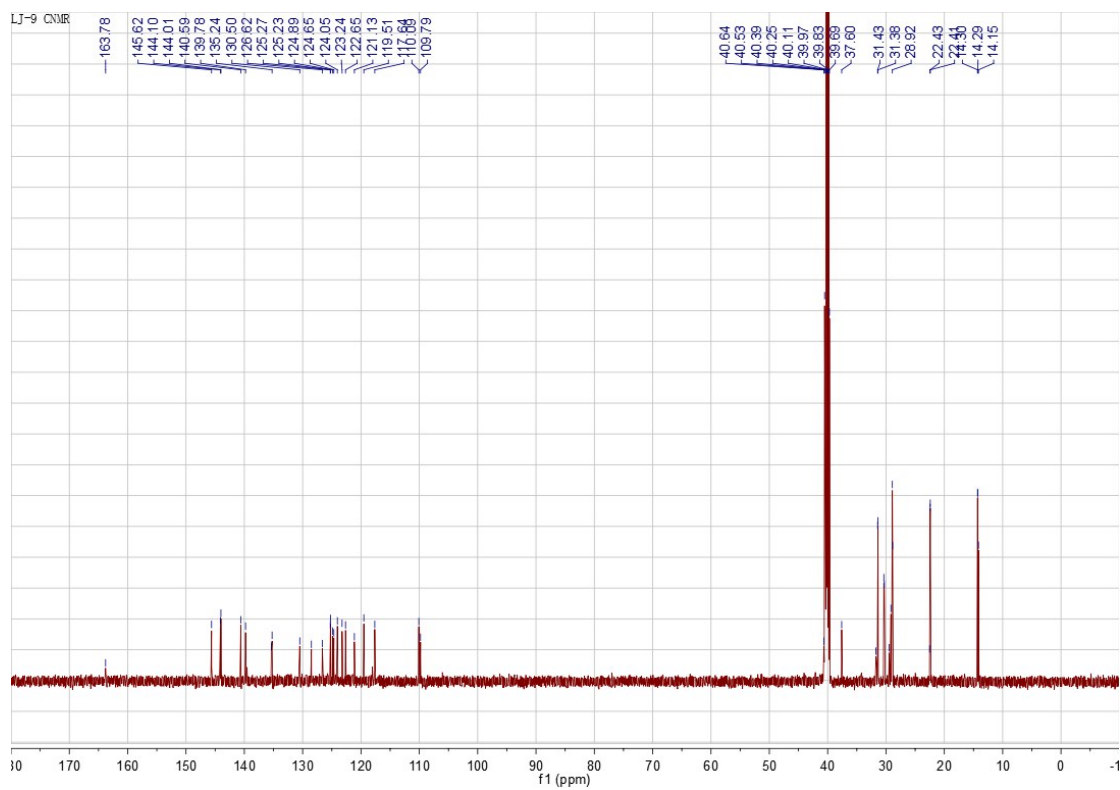

**Fig. S18** <sup>13</sup>C NMR spectra of dye LJ-9.

## Reference

1. M. J. Frisch, G. W. Trucks, H. B. Schlegel, G. E. Scuseria, M. A. Robb, J. R. Cheeseman, G. Scalmani, V. Barone, B. Mennucci, G. A. Petersson, H. Nakatsuji, M. Caricato, X. Li, H. P. Hratchian, A. F. Izmaylov, J. Bloino, G. Zheng, J. L. Sonnenberg, M. Hada, M. Ehara, K. Toyota, R. Fukuda, J. Hasegawa, M. Ishida, T. Nakajima, Y. Honda, O. Kitao, H. Nakai, T. Vreven, J. A. Montgomery Jr., J. E. Peralta, F. Ogliaro, M. Bearpark, J. J. Heyd, E. Brothers, K. N. Kudin, V. N. Staroverov, R. Kobayashi, J. Normand, K. Raghavachari, A. Rendell, J. C. Burant, S. S. Iyengar, J. Tomasi, M. Cossi, N. Rega, J. M. Millam, M. Klene, J. E. Knox, J. B. Cross, V. Bakken, C. Adamo, J. Jaramillo, R. Gomperts, R. E. Stratmann, O. Yazyev, A. J. Austin, R. Cammi, C. Pomelli, J. W. Ochterski, R. L. Martin, K. Morokuma, V. G. Zakrzewski, G. A. Voth, P. Salvador, J. J. Dannenberg, S. Dapprich, A. D. Daniels, O. Farkas, J. B. Foresman, J. V. Ortiz, J. Cioslowski and D. J. Fox, Gaussian 09, Revision A.02; Gaussian, Inc.: Wallingford, CT, **2009**.
